# Supplementary material for: Integrated Genomic and Functional microRNA Analysis Identifies miR-30-5p as a Tumor Suppressor and Potential Therapeutic Nanomedicine in Head and Neck Cancer
Source: Oxford University Press journal article supplement (doi:10.1158/1078-0432.ccr-18-0716), 2019-02-05
Supplement: 10780432ccr180716-sup-197999_3_supp_5267908_pl2vvj.xlsx [file 10780432ccr180716-sup-197999_3_supp_5267908_pl2vvj.xlsx]

## Sheet: Table S1 small RNA seq
A - TCGA								B - UMSC
Mature name	MIMAT ID	Geneind	Score	FoldChange	qval			Mature name	MIMAT ID	Geneind	Score	FoldChange	qval
	up								up
hsa-miR-21-5p	MIMAT0000076	12	1799.9	2.848	0			hsa-miR-517a-3p	MIMAT0002852	1414	54.65	3.32755e+09	0
hsa-miR-196b-5p	MIMAT0001080	101	1719.9	6.054	0			hsa-miR-517c-3p	MIMAT0002866	1416	54.55	1.53579e+09	0
hsa-miR-455-3p	MIMAT0004784	126	1714.45	5.598	0			hsa-miR-517b-3p	MIMAT0002857	1415	52.95	3.32755e+09	0
hsa-miR-106b-3p	MIMAT0004672	150	1699.15	2.131	0			hsa-miR-132-5p	MIMAT0004594	167	49.8	3.551	0
hsa-let-7d-3p	MIMAT0004484	142	1658.35	1.833	0			hsa-miR-542-5p	MIMAT0003340	1467	46.5	4.807	0
hsa-miR-151a-5p	MIMAT0004697	123	1634.75	2.301	0			hsa-miR-223-5p	MIMAT0004570	365	45.5	10.963	0
hsa-miR-423-5p	MIMAT0004748	124	1620.05	2.205	0			hsa-miR-29b-1-5p	MIMAT0004514	415	45.35	4.115	0
hsa-miR-424-5p	MIMAT0001341	103	1554.25	2.837	0			hsa-miR-2355-5p	MIMAT0016895	373	42.1	2.314	4.332
hsa-miR-181b-5p	MIMAT0000257	43	1513.55	1.724	0			hsa-miR-196a-5p	MIMAT0000226	292	41.3	11.348	4.332
hsa-miR-1307-3p	MIMAT0005951	132	1488.5	1.985	0			hsa-miR-196b-5p	MIMAT0001080	294	41.15	14.732	4.332
hsa-miR-320a	MIMAT0000510	83	1418.85	1.965	0			hsa-miR-181a-3p	MIMAT0000270	241	40.4	4.319	5.56
hsa-miR-185-5p	MIMAT0000455	79	1402.75	1.853	0			hsa-miR-181a-2-3p	MIMAT0004558	242	39.3	4.229	5.56
hsa-let-7d-5p	MIMAT0000065	4	1402.05	1.483	0			hsa-miR-941	MIMAT0004984	1722	39.15	4.512	5.56
hsa-miR-2355-5p	MIMAT0016895	133	1388.9	2.368	0			hsa-miR-503-5p	MIMAT0002874	1382	39.05	18.902	5.56
hsa-miR-193b-3p	MIMAT0002819	110	1374.6	3.458	0			hsa-miR-132-3p	MIMAT0000426	166	38.4	1.889	6.749
hsa-miR-183-5p	MIMAT0000261	45	1361.35	2.469	0			hsa-miR-520f-3p	MIMAT0002830	1445	36.75	2.45569e+08	6.749
hsa-miR-25-3p	MIMAT0000081	16	1347.85	1.547	0			hsa-miR-9-5p	MIMAT0000441	1701	36.5	11.27	6.749
hsa-miR-99b-3p	MIMAT0004678	151	1333.4	1.798	0			hsa-miR-519d-3p	MIMAT0002853	1434	35.95	3.68354e+08	7.95
hsa-miR-181a-5p	MIMAT0000256	42	1325.4	1.582	0			hsa-miR-515-3p	MIMAT0002827	1407	35.8	2.55965e+08	7.95
hsa-miR-182-5p	MIMAT0000259	44	1308.85	2.178	0			hsa-miR-519e-3p	MIMAT0002829	1435	35.15	1.48339e+08	7.95
hsa-miR-93-5p	MIMAT0000093	24	1282.15	2.317	0			hsa-miR-520g-3p	MIMAT0002858	1446	35.1	3.06639e+08	7.95
hsa-miR-589-5p	MIMAT0004799	128	1276.8	1.686	0			hsa-miR-520h	MIMAT0002867	1447	35	4.19465e+08	7.95
hsa-miR-28-3p	MIMAT0004502	117	1236.75	1.574	0			hsa-miR-301b-3p	MIMAT0004958	421	34.95	2.786	7.95
hsa-miR-103a-3p	MIMAT0000101	30	1230.4	1.437	0			hsa-miR-424-5p	MIMAT0001341	825	34.75	3.119	7.95
hsa-miR-92b-3p	MIMAT0003218	112	1223.3	2.018	0			hsa-miR-21-5p	MIMAT0000076	332	34.55	8.413	7.95
hsa-miR-146b-5p	MIMAT0002809	109	1221.2	1.906	0			hsa-miR-455-5p	MIMAT0003150	1068	34.5	2.6	7.95
hsa-miR-944	MIMAT0004987	131	1211.9	1.928	0			hsa-miR-542-3p	MIMAT0003389	1466	34.15	2.303	8.87
hsa-miR-197-3p	MIMAT0000227	33	1171.35	1.551	0			hsa-miR-185-5p	MIMAT0000455	254	33.75	2.669	9.747
hsa-miR-542-3p	MIMAT0003389	115	1155.65	1.97	0			hsa-miR-187-3p	MIMAT0000262	258	33.05	4.158	11.136
hsa-miR-92a-3p	MIMAT0000092	23	1132.25	1.612	0			hsa-miR-28-3p	MIMAT0004502	400	32.15	2.285	11.764
hsa-miR-423-3p	MIMAT0001340	102	1129.25	1.848	0			hsa-miR-450b-5p	MIMAT0004909	1024	32.05	2.02233e+08	11.764
hsa-miR-708-5p	MIMAT0004926	130	1119.8	1.866	0			hsa-let-7i-5p	MIMAT0000415	16	32	3.185	11.764
hsa-miR-15b-5p	MIMAT0000417	57	1097.6	1.473	0			hsa-miR-455-3p	MIMAT0004784	1067	31.45	3.077	13.442
hsa-miR-148b-3p	MIMAT0000759	99	1097.4	1.442	0			hsa-miR-1256	MIMAT0005907	92	31.1	2.352	15.247
hsa-miR-484	MIMAT0002174	107	1084.6	1.556	0			hsa-miR-518d-5p	MIMAT0005456	1423	29.65	1.30897e+08	20.059
hsa-miR-342-3p	MIMAT0000753	97	1063.8	1.875	0			hsa-miR-34c-5p	MIMAT0000686	614	29.6	2.194	20.059
hsa-let-7i-5p	MIMAT0000415	56	1049.75	1.504	0			hsa-miR-146a-3p	MIMAT0004608	203	29.3	3.41287e+08	20.059
hsa-miR-224-5p	MIMAT0000281	53	1038	2.3	0			hsa-miR-214-5p	MIMAT0004564	347	29.15	2.011	20.059
hsa-miR-16-5p	MIMAT0000069	8	1025.6	1.404	0			hsa-miR-29a-5p	MIMAT0004503	413	29.15	1.772	20.059
hsa-miR-210-3p	MIMAT0000267	49	1022.25	2.406	0				down
hsa-miR-222-3p	MIMAT0000279	51	1021.1	1.716	0			hsa-miR-100-5p	MIMAT0000098	19	-53.5	0.548	0
hsa-miR-151a-3p	MIMAT0000757	98	1020.25	1.43	0			hsa-miR-99a-5p	MIMAT0000097	1730	-52.65	0.408	0
hsa-miR-181a-2-3p	MIMAT0004558	145	1015.45	1.452	0			hsa-miR-375	MIMAT0000728	741	-51.5	0.036	0
hsa-miR-106b-5p	MIMAT0000680	86	993	1.334	0			hsa-miR-204-5p	MIMAT0000265	319	-50.5	0.103	0
hsa-miR-17-5p	MIMAT0000070	9	991.5	1.816	0			hsa-miR-92b-3p	MIMAT0003218	1710	-48.4	0.352	0
hsa-let-7e-5p	MIMAT0000066	5	983.4	1.6	0			hsa-miR-423-5p	MIMAT0004748	824	-47.25	0.553	0
hsa-miR-193a-5p	MIMAT0004614	121	929.5	1.591	0			hsa-miR-1247-5p	MIMAT0005899	82	-46.75	0.092	0
hsa-miR-15a-5p	MIMAT0000068	7	929	1.501	0			hsa-miR-139-5p	MIMAT0000250	187	-46.15	0.344	0
hsa-miR-708-3p	MIMAT0004927	154	915.35	1.55	0			hsa-miR-99a-3p	MIMAT0004511	1731	-45.75	0.267	0
hsa-miR-132-3p	MIMAT0000426	63	898.15	1.336	0			hsa-miR-125b-2-3p	MIMAT0004603	99	-45.65	0.302	0
hsa-miR-181a-3p	MIMAT0000270	136	878.8	1.372	0			hsa-miR-30d-5p	MIMAT0000245	445	-44.15	0.318	0
hsa-miR-191-5p	MIMAT0000440	70	859.15	1.539	0			hsa-miR-193a-3p	MIMAT0000459	284	-42.75	0.321	0
hsa-miR-9-5p	MIMAT0000441	71	810.95	2.349	0			hsa-miR-365a-3p	MIMAT0000710	657	-42.4	0.393	0
hsa-miR-99b-5p	MIMAT0000689	89	778.8	1.323	0			hsa-miR-378b	MIMAT0014999	750	-40.9	0.307	0
hsa-miR-574-3p	MIMAT0003239	113	738.3	1.38	0			hsa-miR-328-3p	MIMAT0000752	585	-40.35	0.42	0
hsa-miR-205-5p	MIMAT0000266	48	721.95	1.562	0			hsa-miR-338-3p	MIMAT0000763	595	-40.1	0.276	0
hsa-let-7i-3p	MIMAT0004585	146	708.95	1.506	0.113			hsa-miR-497-5p	MIMAT0002820	1368	-39.95	0.319	0
hsa-miR-365a-3p	MIMAT0000710	92	695.85	1.406	0.212			hsa-miR-92a-3p	MIMAT0000092	1707	-39.8	0.639	0
hsa-miR-223-3p	MIMAT0000280	52	690	1.721	0.212			hsa-miR-378e	MIMAT0018927	753	-39.65	0.347	0
hsa-miR-20a-5p	MIMAT0000075	11	687.7	1.623	0.212			hsa-miR-30a-5p	MIMAT0000087	438	-39.4	0.452	0
hsa-miR-425-5p	MIMAT0003393	116	678.25	1.683	0.212			hsa-miR-26a-5p	MIMAT0000082	391	-38.85	0.435	0
hsa-miR-200c-3p	MIMAT0000617	84	667.55	1.401	0.212			hsa-miR-195-5p	MIMAT0000461	290	-38.7	0.429	0
hsa-miR-625-3p	MIMAT0004808	153	655.6	1.371	0.212			hsa-miR-30c-5p	MIMAT0000244	442	-37.9	0.386	0
hsa-miR-155-5p	MIMAT0000646	85	631.85	1.358	0.311			hsa-miR-210-3p	MIMAT0000267	334	-37.3	0.477	2.822
hsa-miR-192-5p	MIMAT0000222	32	629.6	1.233	0.311			hsa-miR-30e-5p	MIMAT0000692	447	-37.15	0.434	2.822
hsa-miR-21-3p	MIMAT0004494	143	615.1	1.748	0.406			hsa-miR-423-3p	MIMAT0001340	823	-37.05	0.513	2.822
hsa-miR-186-5p	MIMAT0000456	80	613.95	1.177	0.406			hsa-miR-30b-5p	MIMAT0000420	440	-36.8	0.488	2.822
hsa-miR-23a-3p	MIMAT0000078	14	578.15	1.224	0.602			hsa-miR-136-3p	MIMAT0004606	181	-35.4	0.319	2.822
hsa-miR-200c-5p	MIMAT0004657	149	536.1	1.448	0.787			hsa-miR-200b-5p	MIMAT0004571	313	-35.4	0.548	2.822
hsa-miR-98-5p	MIMAT0000096	25	525.65	1.1	0.787			hsa-miR-24-1-5p	MIMAT0000079	381	-35.4	0.641	2.822
hsa-miR-629-5p	MIMAT0004810	129	505.75	1.178	0.974			hsa-miR-378d	MIMAT0018926	752	-35.1	0.365	2.822
hsa-miR-24-3p	MIMAT0000080	15	482.85	1.075	1.311			hsa-miR-378g	MIMAT0018937	755	-34.95	0.364	2.822
hsa-miR-146a-5p	MIMAT0000449	76	477.95	1.237	1.311			hsa-miR-887-3p	MIMAT0004951	1692	-34.85	0.249	2.822
hsa-miR-221-3p	MIMAT0000278	50	477	1.227	1.311			hsa-miR-205-5p	MIMAT0000266	320	-34.5	0.405	2.822
hsa-miR-142-3p	MIMAT0000434	66	430.8	1.419	1.838			hsa-miR-885-5p	MIMAT0004947	1691	-34.4	0	2.822
hsa-miR-28-5p	MIMAT0000085	20	402.7	1.09	2.323			hsa-miR-211-5p	MIMAT0000268	335	-34	0.074	2.822
hsa-miR-22-3p	MIMAT0000077	13	391.85	1.163	2.479			hsa-miR-378f	MIMAT0018932	754	-33.95	0.361	2.822
	down							hsa-miR-222-3p	MIMAT0000279	362	-33.8	0.596	2.822
hsa-miR-101-3p	MIMAT0000099	28	-1893.1	0.269	0			hsa-miR-23c	MIMAT0018000	379	-33.65	0.598	2.822
hsa-miR-100-5p	MIMAT0000098	27	-1867.35	0.259	0			hsa-miR-378c	MIMAT0016847	751	-33.45	0.516	2.822
hsa-miR-126-5p	MIMAT0000444	137	-1849.95	0.417	0			hsa-miR-376a-3p	MIMAT0000729	742	-32.85	0.483	4.58
hsa-miR-375	MIMAT0000728	93	-1819.6	0.029	0			hsa-miR-335-5p	MIMAT0000765	591	-32.75	0.218	4.58
hsa-miR-99a-5p	MIMAT0000097	26	-1811.3	0.207	0			hsa-miR-378i	MIMAT0019074	757	-32.5	0.558	4.58
hsa-let-7c-5p	MIMAT0000064	3	-1629.3	0.286	0			hsa-miR-378a-3p	MIMAT0000732	748	-32.45	0.477	4.58
hsa-miR-30a-5p	MIMAT0000087	22	-1600.15	0.391	0			hsa-miR-378h	MIMAT0018984	756	-32.45	0.296	4.58
hsa-miR-30e-5p	MIMAT0000692	90	-1598	0.522	0			hsa-miR-125b-5p	MIMAT0000423	97	-32.4	0.624	4.58
hsa-miR-27b-3p	MIMAT0000419	59	-1545.15	0.414	0			hsa-miR-381-3p	MIMAT0000736	762	-32.35	0.129	4.58
hsa-miR-199b-5p	MIMAT0000263	46	-1544.4	0.398	0			hsa-miR-24-3p	MIMAT0000080	380	-32.3	0.856	4.58
hsa-miR-378a-5p	MIMAT0000731	139	-1537.6	0.396	0			hsa-miR-486-3p	MIMAT0004762	1351	-32.1	0.172	4.58
hsa-miR-125b-5p	MIMAT0000423	61	-1530.95	0.467	0			hsa-miR-664a-3p	MIMAT0005949	1647	-32.1	0.34	4.58
hsa-miR-338-3p	MIMAT0000763	100	-1482.1	0.397	0			hsa-miR-532-3p	MIMAT0004780	1461	-32	0.37	4.58
hsa-miR-29a-3p	MIMAT0000086	21	-1469.7	0.474	0			hsa-miR-30a-3p	MIMAT0000088	439	-31.65	0.429	4.58
hsa-miR-29c-3p	MIMAT0000681	87	-1439.25	0.286	0			hsa-miR-95-3p	MIMAT0000094	1726	-31.5	0.444	5.174
hsa-miR-30a-3p	MIMAT0000088	135	-1417.6	0.332	0			hsa-miR-337-5p	MIMAT0004695	594	-30.9	0.251	5.478
hsa-miR-26a-5p	MIMAT0000082	17	-1361.5	0.595	0			hsa-miR-361-5p	MIMAT0000703	627	-29.85	0.601	7.87
hsa-miR-140-3p	MIMAT0004597	119	-1347.05	0.579	0			hsa-miR-874-3p	MIMAT0004911	1683	-29.85	0.397	7.87
hsa-miR-378a-3p	MIMAT0000732	94	-1330.5	0.489	0			hsa-miR-200a-3p	MIMAT0000682	310	-29.55	0.326	8.977
hsa-miR-10b-5p	MIMAT0000254	40	-1282	0.485	0			hsa-miR-145-5p	MIMAT0000437	198	-29.25	0.65	9.861
hsa-miR-23b-3p	MIMAT0000418	58	-1268.4	0.656	0			hsa-miR-4284	MIMAT0016915	862	-28.7	0.281	10.464
hsa-miR-203a-3p	MIMAT0000264	47	-1176.7	0.409	0			hsa-miR-377-5p	MIMAT0004689	747	-28.65	0.133	10.464
hsa-miR-381-3p	MIMAT0000736	96	-1054.75	0.376	0			hsa-miR-30e-3p	MIMAT0000693	448	-28.55	0.585	10.464
hsa-miR-486-5p	MIMAT0002177	108	-983.9	0.474	0			hsa-miR-33b-5p	MIMAT0003301	601	-28.2	0.313	10.746
hsa-miR-379-5p	MIMAT0000733	95	-980.65	0.527	0			hsa-miR-744-5p	MIMAT0004945	1666	-28.2	0.396	10.746
hsa-miR-30e-3p	MIMAT0000693	138	-881.8	0.687	0			hsa-miR-186-5p	MIMAT0000456	256	-27.35	0.516	13.582
hsa-miR-26b-5p	MIMAT0000083	18	-879.55	0.691	0			hsa-miR-499a-5p	MIMAT0002870	1372	-27	0	14.255
hsa-miR-199a-3p	MIMAT0000232	35	-874.45	0.712	0			hsa-miR-141-3p	MIMAT0000432	190	-26.75	0.471	14.255
hsa-miR-199b-3p	MIMAT0004563	118	-869.1	0.71	0			hsa-miR-26b-5p	MIMAT0000083	394	-26.7	0.667	14.255
hsa-miR-582-3p	MIMAT0004797	127	-720.2	0.693	0.964			hsa-miR-181c-5p	MIMAT0000258	244	-26.45	0.399	14.255
hsa-miR-451a	MIMAT0001631	105	-692.2	0.458	1.299			hsa-miR-133b	MIMAT0000770	173	-26.35	0.106	14.255
hsa-miR-126-3p	MIMAT0000445	73	-639.75	0.709	2.003			hsa-miR-203a-3p	MIMAT0000264	318	-26.3	0.51	14.255
hsa-miR-143-3p	MIMAT0000435	67	-633.15	0.651	2.003			hsa-miR-136-5p	MIMAT0000448	180	-26.25	0.628	14.968
hsa-miR-199a-5p	MIMAT0000231	34	-611.7	0.695	2.633			hsa-miR-376c-3p	MIMAT0000720	745	-25.95	0.294	14.968
hsa-miR-29b-3p	MIMAT0000100	29	-580.2	0.837	2.633			hsa-miR-3622a-5p	MIMAT0018003	647	-25.9	0	14.968
hsa-miR-10a-5p	MIMAT0000253	39	-569.5	0.596	2.758			hsa-miR-154-5p	MIMAT0000452	226	-25.85	0.397	14.968
hsa-miR-206	MIMAT0000462	82	-535.9	0.05	2.88			hsa-miR-133a-3p	MIMAT0000427	172	-25.75	0.099	14.968
hsa-miR-145-5p	MIMAT0000437	68	-535.8	0.793	2.88			hsa-miR-574-3p	MIMAT0003239	1543	-25.7	0.434	14.968
hsa-miR-34a-5p	MIMAT0000255	41	-508.05	0.787	3.023			hsa-mir-1280	MIMAT0005946	132	-25.65	0.425	14.968
hsa-miR-127-5p	MIMAT0004604	120	-497.3	0.875	3.023			hsa-miR-149-5p	MIMAT0000450	214	-25.65	0.473	14.968
hsa-miR-127-3p	MIMAT0000446	74	-483.45	0.779	3.137			hsa-miR-214-3p	MIMAT0000271	346	-25.6	0.492	14.968
hsa-miR-30d-5p	MIMAT0000245	38	-475.45	0.846	3.274			hsa-miR-1291	MIMAT0005881	146	-25.3	0	16.057
hsa-miR-148a-3p	MIMAT0000243	36	-466.6	0.899	3.274			hsa-miR-126-5p	MIMAT0000444	101	-25.2	0.627	16.057
hsa-miR-144-5p	MIMAT0004600	148	-412.75	0.565	3.864			hsa-miR-484	MIMAT0002174	1348	-25.15	0.525	16.057
hsa-miR-30b-5p	MIMAT0000420	60	-404.5	0.895	3.992			hsa-miR-23a-3p	MIMAT0000078	375	-24.9	0.79	16.057
hsa-miR-200b-3p	MIMAT0000318	54	-390.75	0.933	4.118			hsa-miR-99b-5p	MIMAT0000689	1732	-24.9	0.676	16.057
hsa-miR-17-3p	MIMAT0000071	134	-349.75	0.852	4.713			hsa-miR-199b-5p	MIMAT0000263	304	-24.7	0.562	16.435
hsa-miR-374a-3p	MIMAT0004688	152	-314.95	0.808	5.143			hsa-miR-1271-5p	MIMAT0005796	118	-24.45	0.624	16.686
hsa-miR-532-5p	MIMAT0002888	111	-276.15	0.894	5.982			hsa-miR-1268a	MIMAT0005922	111	-24.3	0	16.933
hsa-miR-149-5p	MIMAT0000450	77	-271.75	0.823	5.982			hsa-miR-186-3p	MIMAT0004612	257	-24.1	0.396	17.415
hsa-miR-150-5p	MIMAT0000451	78	-195	0.779	7.762			hsa-miR-3615	MIMAT0017994	635	-24.1	0.37	17.415
hsa-let-7b-5p	MIMAT0000063	2	-184.35	0.97	8.004			hsa-miR-422a	MIMAT0001339	822	-23.7	0	18.026
hsa-let-7a-5p	MIMAT0000062	1	-174.75	0.898	8.242			hsa-miR-1249-3p	MIMAT0005901	84	-23.4	0.287	18.627

## Sheet: Table S3 Proliferation screen
Gene	Signal	MAD Score
hsa-miR-29b-1-5p	4.18777	-2.24891	MIMAT0004514
hsa-miR-593-5p	8.12201	-2.07053	MIMAT0003261
hsa-miR-603	9.64568	-2.00145	MIMAT0003271
hsa-miR-137	10.4889	-1.96322	MIMAT0000429
hsa-miR-217	10.5106	-1.96223	MIMAT0000274
hsa-miR-570-3p	10.5516	-1.96038	MIMAT0003235
hsa-miR-27b-5p	13.1005	-1.8448	MIMAT0004588
hsa-miR-216b-5p	13.1873	-1.84087	MIMAT0004959
hsa-miR-589-5p	14.4778	-1.78236	MIMAT0004799
hsa-miR-9-5p	14.5333	-1.77984	MIMAT0000441
hsa-miR-145-5p	15.3092	-1.74466	MIMAT0000437
hsa-miR-96-5p	15.685	-1.72762	MIMAT0000095
hsa-miR-657	15.8721	-1.71914	MIMAT0003335
hsa-miR-608	17.8017	-1.63165	MIMAT0003276
hsa-miR-619-3p	18.3711	-1.60584	MIMAT0003288
hsa-miR-548o-3p	18.7687	-1.58781	MIMAT0005919
hsa-miR-26a-5p	18.8467	-1.58427	MIMAT0000082
hsa-miR-633	19.398	-1.55928	MIMAT0003303
hsa-miR-542-5p	19.6848	-1.54627	MIMAT0003340
hsa-miR-330-3p	20.2971	-1.51851	MIMAT0000751
hsa-miR-1272	20.4797	-1.51023	MIMAT0005925
hsa-miR-136-5p	20.6935	-1.50054	MIMAT0000448
hsa-miR-1236-3p	20.8773	-1.4922	MIMAT0005591
hsa-miR-375	21.1544	-1.47964	MIMAT0000728
hsa-miR-875-5p	21.1604	-1.47937	MIMAT0004922
hsa-miR-802	21.5111	-1.46347	MIMAT0004185
hsa-miR-1270	21.7396	-1.45311	MIMAT0005924
hsa-miR-491-5p	21.8071	-1.45005	MIMAT0002807
hsa-miR-548d-3p	21.9869	-1.44189	MIMAT0003323
hsa-miR-1201	22.4862	-1.41926	dead
hsa-miR-1826	22.5667	-1.41561	dead
hsa-miR-888-5p	22.9119	-1.39995	MIMAT0004916
hsa-miR-513a-3p	23.1343	-1.38987	MIMAT0004777
hsa-miR-612	23.6323	-1.36729	MIMAT0003280
hsa-miR-30c-5p	23.732	-1.36277	MIMAT0000244
hsa-miR-1299	23.8779	-1.35616	MIMAT0005887
hsa-miR-1975	24.1867	-1.34216	dead
hsa-miR-24-1-5p	24.3767	-1.33354	MIMAT0000079
hsa-miR-340-5p	24.5974	-1.32354	MIMAT0004692
hsa-miR-138-2-3p	24.6631	-1.32056	MIMAT0004596
hsa-miR-541-5p	24.8673	-1.3113	MIMAT0004919
hsa-miR-142-3p	25.0961	-1.30093	MIMAT0000434
hsa-miR-544a	25.1435	-1.29877	MIMAT0003164
hsa-miR-567	25.3023	-1.29157	MIMAT0003231
hsa-miR-146a-5p	25.3095	-1.29125	MIMAT0000449
hsa-miR-630	25.5834	-1.27883	MIMAT0003299
hsa-miR-18a-5p	25.8725	-1.26572	MIMAT0000072
hsa-miR-616-3p	25.9572	-1.26188	MIMAT0004805
hsa-miR-215-5p	26.0876	-1.25597	MIMAT0000272
hsa-miR-578	26.4295	-1.24047	MIMAT0003243
hsa-miR-30b-5p	26.8676	-1.2206	MIMAT0000420
hsa-miR-186-5p	27.105	-1.20984	MIMAT0000456
hsa-miR-590-5p	27.1231	-1.20902	MIMAT0003258
hsa-miR-518c-5p	27.1272	-1.20883	MIMAT0002847
hsa-miR-7-5p	27.3127	-1.20042	MIMAT0000252
hsa-miR-342-3p	27.328	-1.19973	MIMAT0000753
hsa-miR-30a-5p	27.4779	-1.19293	MIMAT0000087
hsa-miR-30e-5p	27.5222	-1.19092	MIMAT0000692
hsa-miR-153-3p	27.6156	-1.18669	MIMAT0000439
hsa-miR-139-5p	27.6602	-1.18467	MIMAT0000250
hsa-miR-421	27.6728	-1.1841	MIMAT0003339
hsa-miR-522-3p	27.885	-1.17448	MIMAT0002868
hsa-miR-580-3p	27.8944	-1.17405	MIMAT0003245
hsa-miR-642a-5p	28.1603	-1.16199	MIMAT0003312
hsa-miR-200c-3p	28.3673	-1.15261	MIMAT0000617
hsa-miR-503-5p	28.5606	-1.14384	MIMAT0002874
hsa-miR-17-5p	28.655	-1.13956	MIMAT0000070
hsa-miR-125b-2-3p	28.7904	-1.13342	MIMAT0004603
hsa-miR-20a-5p	28.9898	-1.12438	MIMAT0000075
hsa-miR-205-5p	29.0772	-1.12042	MIMAT0000266
hsa-miR-618	29.1075	-1.11905	MIMAT0003287
hsa-miR-30e-3p	29.3329	-1.10883	MIMAT0000693
hsa-miR-124-5p	29.9333	-1.0816	MIMAT0004591
hsa-miR-29a-5p	30.2131	-1.06892	MIMAT0004503
hsa-miR-129-2-3p	30.3154	-1.06428	MIMAT0004605
hsa-miR-599	30.3696	-1.06182	MIMAT0003267
hsa-miR-191-5p	30.4074	-1.06011	MIMAT0000440
hsa-miR-548b-5p	30.4803	-1.05681	MIMAT0004798
hsa-miR-1244	30.4992	-1.05595	MIMAT0005896
hsa-miR-452-5p	30.5642	-1.053	MIMAT0001635
hsa-miR-664a-3p	30.5737	-1.05257	MIMAT0005949
hsa-miR-1184	30.7097	-1.04641	MIMAT0005829
hsa-miR-586	30.7517	-1.0445	MIMAT0003252
hsa-miR-573	30.8711	-1.03908	MIMAT0003238
hsa-miR-885-5p	30.9919	-1.03361	MIMAT0004947
hsa-miR-548h-5p	31.0321	-1.03178	MIMAT0005928
hsa-miR-542-3p	31.0685	-1.03013	MIMAT0003389
hsa-miR-338-3p	31.0792	-1.02965	MIMAT0000763
hsa-miR-200b-3p	31.1517	-1.02636	MIMAT0000318
hsa-miR-651-5p	31.2051	-1.02394	MIMAT0003321
hsa-miR-155-5p	31.2242	-1.02308	MIMAT0000646
hsa-miR-526b-5p	31.3515	-1.0173	MIMAT0002835
hsa-miR-1178-3p	31.3738	-1.01629	MIMAT0005823
hsa-miR-449b-5p	31.3843	-1.01582	MIMAT0003327
hsa-miR-216a-5p	31.4444	-1.01309	MIMAT0000273
hsa-miR-224-5p	31.5752	-1.00716	MIMAT0000281
hsa-miR-19b-3p	31.5996	-1.00606	MIMAT0000074
hsa-miR-506-3p	31.6106	-1.00556	MIMAT0002878
hsa-miR-30d-5p	31.6298	-1.00469	MIMAT0000245
hsa-miR-26b-5p	31.6976	-1.00161	MIMAT0000083

## Sheet: Table S4  inv predicted targets
© 2000-2013 Ingenuity Systems, Inc. All rights reserved.
ID		Source	Confidence	ID	Symbol	t.stat	p-value	q-value		Pathway
hsa-miR-30a-5p		TarBase,TargetScan Human	Experimentally Observed,High (predicted)	NT5E	NT5E	-2.67544	0.00785943	0.0424433		Adenosine Nucleotides Degradation II Guanosine Nucleotides Degradation III NAD Salvage Pathway II Purine Nucleotides Degradation II (Aerobic) Urate Biosynthesis/Inosine 5'-phosphate Degradation
hsa-miR-30a-5p		TarBase,TargetScan Human	Experimentally Observed,High (predicted)	SLC7A11	SLC7A11	-7.34317	1.85185e-12	2.47526e-10
hsa-miR-30a-5p		TarBase	Experimentally Observed	WNT5A	WNT5A	-3.21244	0.00145446	0.011478		Axonal Guidance Signaling Basal Cell Carcinoma Signaling Colorectal Cancer Metastasis Signaling Glioblastoma Multiforme Signaling Human Embryonic Stem Cell Pluripotency Molecular Mechanisms of Cancer Ovarian Cancer Signaling Role of Macrophages, Fibroblasts and Endothelial Cells in Rheumatoid Arthritis Role of NANOG in Mammalian Embryonic Stem Cell Pluripotency Role of Osteoblasts, Osteoclasts an…
hsa-miR-30a-5p		TarBase	Experimentally Observed	MET	MET	-4.49672	9.76433e-06	0.000186635		Clathrin-mediated Endocytosis Signaling Epithelial Adherens Junction Signaling FGF Signaling HGF Signaling Hepatic Fibrosis / Hepatic Stellate Cell Activation Macropinocytosis Signaling Remodeling of Epithelial Adherens Junctions Renal Cell Carcinoma Signaling Semaphorin Signaling in Neurons
hsa-miR-30a-5p		miRecords	Experimentally Observed	STX1A	STX1A	-5.73134	2.36158e-08	1.04475e-06		Huntington's Disease Signaling
hsa-miR-30a-5p		TargetScan Human	High (predicted)	ADAM12	ADAM12	-5.8907	1.00092e-08	4.93575e-07		Axonal Guidance Signaling Inhibition of Matrix Metalloproteases
hsa-miR-30a-5p		TargetScan Human	High (predicted)	ADAMTS14	ADAMTS14	-4.448	1.20949e-05	0.000223621
hsa-miR-30a-5p		TargetScan Human	High (predicted)	ADAMTS6	ADAMTS6	-3.11958	0.00198133	0.0146471		Axonal Guidance Signaling
hsa-miR-30a-5p		TargetScan Human	High (predicted)	AFAP1L2	AFAP1L2	-3.57478	0.000406389	0.00412906
hsa-miR-30a-5p		TargetScan Human	High (predicted)	BCL11B	BCL11B	-7.45518	9.04336e-13	1.30665e-10
hsa-miR-30a-5p		TargetScan Human	High (predicted)	BNC1	BNC1	-10.1613	3.98632e-21	3.3215e-18
hsa-miR-30a-5p		TargetScan Human	High (predicted)	CALB2	CALB2	-2.60695	0.00957701	0.0492627
hsa-miR-30a-5p		TargetScan Human	High (predicted)	CAMK2N2	CAMK2N2	-4.33529	1.97034e-05	0.000337565
hsa-miR-30a-5p		TargetScan Human	High (predicted)	CBX2	CBX2	-7.41229	1.19093e-12	1.66992e-10
hsa-miR-30a-5p		TargetScan Human	Moderate (predicted)	CCNA1	CCNA1	-3.39196	0.000783934	0.00701328		Acute Myeloid Leukemia Signaling Antiproliferative Role of TOB in T Cell Signaling Aryl Hydrocarbon Receptor Signaling Cyclins and Cell Cycle Regulation Estrogen-mediated S-phase Entry Regulation of Cellular Mechanics by Calpain Protease eNOS Signaling
hsa-miR-30a-5p		TargetScan Human	High (predicted)	CCNE2	CCNE2	-3.58521	0.000391123	0.00400263		Antiproliferative Role of TOB in T Cell Signaling Aryl Hydrocarbon Receptor Signaling Breast Cancer Regulation by Stathmin1 Cell Cycle Regulation by BTG Family Proteins Cell Cycle: G1/S Checkpoint Regulation Cyclins and Cell Cycle Regulation DNA damage-induced 14-3-3σ Signaling Estrogen-mediated S-phase Entry Factors Promoting Cardiogenesis in Vertebrates GADD45 Signaling HER-2 Signaling in Breas…
hsa-miR-30a-5p		TargetScan Human	Moderate (predicted)	CD80	CD80	-3.23442	0.00135044	0.0108221		Allograft Rejection Signaling Altered T Cell and B Cell Signaling in Rheumatoid Arthritis Autoimmune Thyroid Disease Signaling B Cell Development CD28 Signaling in T Helper Cells CTLA4 Signaling in Cytotoxic T Lymphocytes Communication between Innate and Adaptive Immune Cells Crosstalk between Dendritic Cells and Natural Killer Cells Dendritic Cell Maturation Graft-versus-Host Disease Signaling N…
hsa-miR-30a-5p		TargetScan Human	High (predicted)	CDCA7	CDCA7	-2.94594	0.00346369	0.0226504
hsa-miR-30a-5p		TargetScan Human	Moderate (predicted)	CDHR1	CDHR1	-3.55523	0.000436556	0.00437541
hsa-miR-30a-5p		TargetScan Human	High (predicted)	CELSR3	CELSR3	-4.19807	3.52109e-05	0.000549357
hsa-miR-30a-5p		TargetScan Human	Moderate (predicted)	LASS3	CERS3	-6.93548	2.3632e-11	2.38628e-09
hsa-miR-30a-5p		TargetScan Human	High (predicted)	CHST1	CHST1	-3.42212	0.000704766	0.00643943		Chondroitin Sulfate Biosynthesis Chondroitin Sulfate Biosynthesis (Late Stages) Dermatan Sulfate Biosynthesis Dermatan Sulfate Biosynthesis (Late Stages) Heparan Sulfate Biosynthesis Heparan Sulfate Biosynthesis (Late Stages) LPS/IL-1 Mediated Inhibition of RXR Function Xenobiotic Metabolism Signaling
hsa-miR-30a-5p		TargetScan Human	High (predicted)	CHST2	CHST2	-6.88903	3.1387e-11	3.07078e-09		Chondroitin Sulfate Biosynthesis Chondroitin Sulfate Biosynthesis (Late Stages) Dermatan Sulfate Biosynthesis Dermatan Sulfate Biosynthesis (Late Stages) Heparan Sulfate Biosynthesis Heparan Sulfate Biosynthesis (Late Stages) LPS/IL-1 Mediated Inhibition of RXR Function Xenobiotic Metabolism Signaling
hsa-miR-30a-5p		TargetScan Human	High (predicted)	CNGB3	CNGB3	-4.62375	5.53974e-06	0.000115408		Gαs Signaling Phototransduction Pathway Protein Kinase A Signaling Regulation of Cellular Mechanics by Calpain Protease cAMP-mediated signaling eNOS Signaling
hsa-miR-30a-5p		TargetScan Human	High (predicted)	COL13A1	COL13A1	-6.52577	2.75642e-10	2.0983e-08		VDR/RXR Activation
hsa-miR-30a-5p		TargetScan Human	High (predicted)	CTHRC1	CTHRC1	-3.81302	0.000165627	0.00198482
hsa-miR-30a-5p		TargetScan Human	High (predicted)	DDIT4	DDIT4	-3.52927	0.000479849	0.00472404		mTOR Signaling
hsa-miR-30a-5p		TargetScan Human	Moderate (predicted)	DSP	DSP	-5.75525	2.07851e-08	9.34316e-07		ILK Signaling
hsa-miR-30a-5p		TargetScan Human	High (predicted)	E2F7	E2F7	-5.78932	1.73165e-08	7.96717e-07
hsa-miR-30a-5p		TargetScan Human	High (predicted)	EFNA3	EFNA3	-4.17635	3.85463e-05	0.000592557		Axonal Guidance Signaling Ephrin A Signaling Ephrin Receptor Signaling
hsa-miR-30a-5p		TargetScan Human	Moderate (predicted)	EGFR	EGFR	-2.69295	0.00746753	0.0408393
hsa-miR-30a-5p		TargetScan Human	High (predicted)	EPB41L4B	EPB41L4B	-3.15221	0.00177887	0.0134562
hsa-miR-30a-5p		TargetScan Human	High (predicted)	FAM43A	FAM43A	-4.71164	3.71535e-06	8.21663e-05
hsa-miR-30a-5p		TargetScan Human	High (predicted)	FAP	FAP	-4.57488	6.89975e-06	0.000139116
hsa-miR-30a-5p		TargetScan Human	High (predicted)	FOXD1	FOXD1	-5.39201	1.38359e-07	4.85439e-06
hsa-miR-30a-5p		TargetScan Human	High (predicted)	FZD2	FZD2	-5.21242	3.41003e-07	1.05844e-05		Axonal Guidance Signaling Basal Cell Carcinoma Signaling Colorectal Cancer Metastasis Signaling Factors Promoting Cardiogenesis in Vertebrates Glioblastoma Multiforme Signaling Human Embryonic Stem Cell Pluripotency Molecular Mechanisms of Cancer Mouse Embryonic Stem Cell Pluripotency Ovarian Cancer Signaling Role of Macrophages, Fibroblasts and Endothelial Cells in Rheumatoid Arthritis Role of N…
hsa-miR-30a-5p		TargetScan Human	High (predicted)	GJA1	GJA1	-6.45364	4.20122e-10	3.04202e-08		Ovarian Cancer Signaling Wnt/β-catenin Signaling
hsa-miR-30a-5p		TargetScan Human	High (predicted)	GLDC	GLDC	-2.71789	0.00693956	0.0386313		Glycine Cleavage Complex
hsa-miR-30a-5p		TargetScan Human	Moderate (predicted)	GNRHR	GNRHR	-4.11924	4.88169e-05	0.000721673		GNRH Signaling
hsa-miR-30a-5p		TargetScan Human	High (predicted)	GRHL1	GRHL1	-2.67624	0.00784124	0.0423691
hsa-miR-30a-5p		TargetScan Human	High (predicted)	HEPHL1	HEPHL1	-5.0097	9.17333e-07	2.48043e-05
hsa-miR-30a-5p		TargetScan Human	High (predicted)	HOXA11	HOXA11	-5.77494	1.87057e-08	8.52358e-07
hsa-miR-30a-5p		TargetScan Human	High (predicted)	HTRA3	HTRA3	-2.92943	0.00364778	0.0235774
hsa-miR-30a-5p		TargetScan Human	High (predicted)	IGF1R	IGF1R	-3.52927	0.00021693	0.000384284
hsa-miR-30a-5p		TargetScan Human	High (predicted)	IL1A	IL1A	-6.20891	1.71136e-09	1.04732e-07		Acute Phase Response Signaling Altered T Cell and B Cell Signaling in Rheumatoid Arthritis Aryl Hydrocarbon Receptor Signaling Atherosclerosis Signaling Cholecystokinin/Gastrin-mediated Signaling Communication between Innate and Adaptive Immune Cells Dendritic Cell Maturation Differential Regulation of Cytokine Production in Intestinal Epithelial Cells by IL-17A and IL-17F FXR/RXR Activation Graf…
hsa-miR-30a-5p		TargetScan Human	High (predicted)	IL28RA	IL28RA	-4.58937	6.46628e-06	0.000131627
hsa-miR-30a-5p		TargetScan Human	High (predicted)	IRS1	IRS1	-2.61196	0.00944086	0.0487339		AMPK Signaling Cardiac Hypertrophy Signaling GDNF Family Ligand-Receptor Interactions Growth Hormone Signaling IGF-1 Signaling IL-4 Signaling IL-9 Signaling ILK Signaling Insulin Receptor Signaling Molecular Mechanisms of Cancer PI3K Signaling in B Lymphocytes PPARα/RXRα Activation Prolactin Signaling Regulation of eIF4 and p70S6K Signaling Role of JAK1 and JAK3 in γc Cytokine Signaling Role of J…
hsa-miR-30a-5p		TargetScan Human	High (predicted)	IRX4	IRX4	-4.38851	1.56676e-05	0.000278244
hsa-miR-30a-5p		TargetScan Human	High (predicted)	ITGA5	ITGA5	-5.94408	7.47857e-09	3.82354e-07		Actin Cytoskeleton Signaling Actin Nucleation by ARP-WASP Complex Agrin Interactions at Neuromuscular Junction Axonal Guidance Signaling Caveolar-mediated Endocytosis Signaling Cdc42 Signaling Clathrin-mediated Endocytosis Signaling ERK/MAPK Signaling Ephrin Receptor Signaling FAK Signaling Integrin Signaling Macropinocytosis Signaling NF-κB Activation by Viruses Neuregulin Signaling PAK Signalin…
hsa-miR-30a-5p		TargetScan Human	High (predicted)	ITGA6	ITGA6	-6.76279	6.74152e-11	6.04954e-09		Agrin Interactions at Neuromuscular Junction CDK5 Signaling Caveolar-mediated Endocytosis Signaling Germ Cell-Sertoli Cell Junction Signaling Integrin Signaling NF-κB Activation by Viruses Paxillin Signaling Reelin Signaling in Neurons Role of Tissue Factor in Cancer Virus Entry via Endocytic Pathways
hsa-miR-30a-5p		TargetScan Human	High (predicted)	KIAA1804	KIAA1804	-3.06917	0.00233624	0.0166711		Signaling by Rho Family GTPases
hsa-miR-30a-5p		TargetScan Human	High (predicted)	KIF3C	KIF3C	-4.79377	2.54422e-06	5.94757e-05
hsa-miR-30a-5p		TargetScan Human	High (predicted)	LHX1	LHX1	-7.00892	1.50482e-11	1.59942e-09
hsa-miR-30a-5p		TargetScan Human	High (predicted)	LOX	LOX	-3.09258	0.00216471	0.0157011
hsa-miR-30a-5p		TargetScan Human	High (predicted)	LRRC3	LRRC3	-4.33577	1.96624e-05	0.000336972
hsa-miR-30a-5p		TargetScan Human	High (predicted)	MAF	MAF	-3.14025	0.00185073	0.0138827		IL-12 Signaling and Production in Macrophages NRF2-mediated Oxidative Stress Response Xenobiotic Metabolism Signaling
hsa-miR-30a-5p		TargetScan Human	High (predicted)	MFHAS1	MFHAS1	-4.75352	3.06498e-06	6.97331e-05
hsa-miR-30a-5p		TargetScan Human	High (predicted)	MYBL2	MYBL2	-7.83707	7.44621e-14	1.39556e-11
hsa-miR-30a-5p		TargetScan Human	High (predicted)	MYH10	MYH10	-3.74269	0.00021693	0.00247708		Actin Cytoskeleton Signaling Calcium Signaling Cellular Effects of Sildenafil (Viagra) Epithelial Adherens Junction Signaling Hepatic Fibrosis / Hepatic Stellate Cell Activation ILK Signaling Protein Kinase A Signaling Tight Junction Signaling
hsa-miR-30a-5p		TargetScan Human	Moderate (predicted)	MYO1H	MYO1H	-2.68	0.00775571	0.0420207
hsa-miR-30a-5p		TargetScan Human	High (predicted)	NEFL	NEFL	-5.76182	2.00674e-08	9.0609e-07		Amyotrophic Lateral Sclerosis Signaling
hsa-miR-30a-5p		TargetScan Human	High (predicted)	NID1	NID1	-4.56143	7.32713e-06	0.000146362
hsa-miR-30a-5p		TargetScan Human	High (predicted)	NOD2	NOD2	-5.23065	3.11499e-07	9.79208e-06		Role of Pattern Recognition Receptors in Recognition of Bacteria and Viruses TREM1 Signaling
hsa-miR-30a-5p		TargetScan Human	High (predicted)	C5orf13	NREP	-3.09434	0.00215234	0.0156319
hsa-miR-30a-5p		TargetScan Human	High (predicted)	NTM	NTM	-3.79283	0.000179041	0.00211561
hsa-miR-30a-5p		TargetScan Human	High (predicted)	ONECUT2	ONECUT2	-2.66567	0.0080862	0.0433674
hsa-miR-30a-5p		TargetScan Human	High (predicted)	OVOL1	OVOL1	-3.56263	0.0004249	0.00428063
hsa-miR-30a-5p		TargetScan Human	High (predicted)	PAG1	PAG1	-3.29063	0.00111491	0.00929251		B Cell Receptor Signaling T Cell Receptor Signaling
hsa-miR-30a-5p		TargetScan Human	High (predicted)	PCDH17	PCDH17	-2.62238	0.00916308	0.0476537
hsa-miR-30a-5p		TargetScan Human	High (predicted)	PDGFRB	PDGFRB	-3.1546	0.00176483	0.0133725		Glioblastoma Multiforme Signaling Glioma Signaling Hepatic Fibrosis / Hepatic Stellate Cell Activation Human Embryonic Stem Cell Pluripotency NF-κB Signaling PAK Signaling PDGF Signaling PPAR Signaling PTEN Signaling Sphingosine-1-phosphate Signaling
hsa-miR-30a-5p		TargetScan Human	Moderate (predicted)	PHLDB2	PHLDB2	-7.25139	3.31361e-12	4.15821e-10
hsa-miR-30a-5p		TargetScan Human	Moderate (predicted)	PNPLA1	PNPLA1	-6.83038	4.48253e-11	4.20919e-09
hsa-miR-30a-5p		TargetScan Human	High (predicted)	PPFIA1	PPFIA1	-3.44793	0.000643005	0.00598165		3-phosphoinositide Biosynthesis 3-phosphoinositide Degradation D-myo-inositol (1,4,5,6)-Tetrakisphosphate Biosynthesis D-myo-inositol (3,4,5,6)-tetrakisphosphate Biosynthesis D-myo-inositol-5-phosphate Metabolism Superpathway of Inositol Phosphate Compounds
hsa-miR-30a-5p		TargetScan Human	High (predicted)	PPP1R14C	PPP1R14C	-5.52887	6.84932e-08	2.63407e-06		Breast Cancer Regulation by Stathmin1 CDK5 Signaling Cardiac β-adrenergic Signaling Dopamine Receptor Signaling Dopamine-DARPP32 Feedback in cAMP Signaling ERK/MAPK Signaling Insulin Receptor Signaling Production of Nitric Oxide and Reactive Oxygen Species in Macrophages Protein Kinase A Signaling Synaptic Long Term Potentiation
hsa-miR-30a-5p		TargetScan Human	High (predicted)	PPP4R4	PPP4R4	-2.9497	0.00342301	0.0224445
hsa-miR-30a-5p		TargetScan Human	High (predicted)	RAB38	RAB38	-5.19914	3.64185e-07	1.11991e-05
hsa-miR-30a-5p		TargetScan Human	High (predicted)	RHEBL1	RHEBL1	-2.87936	0.00426207	0.0265919
hsa-miR-30a-5p		TargetScan Human	High (predicted)	RTN4R	RTN4R	-5.76779	1.94356e-08	8.81367e-07		Axonal Guidance Signaling
hsa-miR-30a-5p		TargetScan Human	High (predicted)	SCN8A	SCN8A	-3.00949	0.00283162	0.0193694
hsa-miR-30a-5p		TargetScan Human	High (predicted)	SERPINE1	SERPINE1	-6.14674	2.4297e-09	1.4251e-07		Acute Phase Response Signaling Coagulation System Glucocorticoid Receptor Signaling HMGB1 Signaling TGF-β Signaling
hsa-miR-30a-5p		TargetScan Human	High (predicted)	SLC44A5	SLC44A5	-4.0284	7.06948e-05	0.000981803
hsa-miR-30a-5p		TargetScan Human	Moderate (predicted)	SLCO6A1	SLCO6A1	-4.63823	5.18905e-06	0.000109185
hsa-miR-30a-5p		TargetScan Human	High (predicted)	SNX10	SNX10	-6.11018	2.98216e-09	1.70412e-07
hsa-miR-30a-5p		TargetScan Human	High (predicted)	SOCS1	SOCS1	-2.84294	0.00476672	0.0289902		Acute Phase Response Signaling Erythropoietin Signaling Growth Hormone Signaling IGF-1 Signaling IL-2 Signaling IL-4 Signaling IL-6 Signaling Interferon Signaling JAK/Stat Signaling Prolactin Signaling Role of JAK family kinases in IL-6-type Cytokine Signaling Role of JAK1 and JAK3 in γc Cytokine Signaling Role of JAK1, JAK2 and TYK2 in Interferon Signaling Role of JAK2 in Hormone-like Cytokine S…
hsa-miR-30a-5p		TargetScan Human	Moderate (predicted)	STAT1	STAT1	-2.94123	0.0035153	0.0229134		Activation of IRF by Cytosolic Pattern Recognition Receptors CNTF Signaling Colorectal Cancer Metastasis Signaling Dendritic Cell Maturation EGF Signaling ERK/MAPK Signaling FLT3 Signaling in Hematopoietic Progenitor Cells GM-CSF Signaling Glucocorticoid Receptor Signaling Growth Hormone Signaling Hepatic Fibrosis / Hepatic Stellate Cell Activation IL-12 Signaling and Production in Macrophages IL…
hsa-miR-30a-5p		TargetScan Human	High (predicted)	THBS2	THBS2	-3.48948	0.000554092	0.00530563		Inhibition of Matrix Metalloproteases
hsa-miR-30a-5p		TargetScan Human	High (predicted)	TMC7	TMC7	-4.4635	1.1301e-05	0.000211182
hsa-miR-30a-5p		TargetScan Human	Moderate (predicted)	TNFSF9	TNFSF9	-4.07698	5.8042e-05	0.000833474		4-1BB Signaling in T Lymphocytes
hsa-miR-30a-5p		TargetScan Human	High (predicted)	TRIM9	TRIM9	-2.6338	0.00886708	0.0464912
hsa-miR-30a-5p		TargetScan Human	High (predicted)	TRPA1	TRPA1	-5.02466	8.53629e-07	2.33216e-05
hsa-miR-30a-5p		TargetScan Human	High (predicted)	WNT7B	WNT7B	-8.91065	4.42247e-17	1.68683e-14		Axonal Guidance Signaling Basal Cell Carcinoma Signaling Colorectal Cancer Metastasis Signaling Glioblastoma Multiforme Signaling Human Embryonic Stem Cell Pluripotency Ovarian Cancer Signaling Role of Macrophages, Fibroblasts and Endothelial Cells in Rheumatoid Arthritis Role of NANOG in Mammalian Embryonic Stem Cell Pluripotency Role of Osteoblasts, Osteoclasts and Chondrocytes in Rheumatoid Ar…

## Sheet: Table S5 IPA analysis of target
A. Proliferation
ID	Genes in dataset	Literature Findings
IRS1	IRS1	Affects (1)
NT5E	NT5E	Increases (3)
EGFR	EGFR	Increases (33)
GLDC	GLDC	Increases (2)
SOCS1	SOCS1	Decreases (3)
STAT1	STAT1	Decreases (5)
LOX	LOX	Increases (3)
PDGFRB	PDGFRB	Increases (2)
WNT5A	WNT5A	Increases (7)
CD80	CD80	Decreases (1)
CCNA1	CCNA1	Increases (5)
THBS2	THBS2	Decreases (2)
IGF1R	IGF1R	Increases (6)
AFAP1L2	AFAP1L2	Affects (1)
CTHRC1	CTHRC1	Increases (1)
MET	MET	Increases (17)
FAP	FAP	Increases (1)
SERPINE1	SERPINE1	Affects (5)
IL1A	IL1A	Decreases (10)
GJA1	GJA1	Decreases (2)
MYBL2	MYBL2	Increases (1)
B. Metastasis
ID	Genes in dataset	Literature Findings
IRS1	IRS1	Affects (1)
TRIM9	TRIM9	Affects (1)
NT5E	NT5E	Increases (7)
EGFR	EGFR	Increases (92)
SOCS1	SOCS1	Decreases (1)
STAT1	STAT1	Affects (1)
LOX	LOX	Increases (1)
EPB41L4B	EPB41L4B	Affects (2)
PDGFRB	PDGFRB	Affects (37)
WNT5A	WNT5A	Decreases (7)
CD80	CD80	Decreases (1)
CCNA1	CCNA1	Increases (5)
IGF1R	IGF1R	Increases (1)
CTHRC1	CTHRC1	Increases (1)
GNRHR	GNRHR	Affects (15)
MET	MET	Increases (22)
ITGA5	ITGA5	Affects (8)
SERPINE1	SERPINE1	Decreases (7)
IL1A	IL1A	Increases (1)
GJA1	GJA1	Decreases (1)
ITGA6	ITGA6	Affects (2)
SLC7A11	SLC7A11	Affects (1)
MYBL2	MYBL2	Affects (1)

## Sheet: Table S6 RPPA correlations
Experimentally validated targets (miRTarBase)
miR	Target Gene	Spearman correlation	FDR	log10(FDR)
hsa-miR-30c-5p	SERPINE1	-0.2	0.031788	1.5
hsa-miR-30a-5p	ANXA1	-0.2	0.0320678	1.49
Predicted targets (Targetscan)
miR	Target Gene	Spearman correlation	FDR	log10(FDR)
hsa-miR-30a-5p	YBX1	-0.19	0.0448171	1.35
hsa-miR-30d-5p	SERPINE1	-0.24	0.00862386	2.06
hsa-miR-30e-5p	SERPINE1	-0.3	0.00061571	3.21

## Sheet: Table S7 methyl and exp cor
probe	gene	mean expression in unmeth group	mean expression in meth group	tstat	pval	adj.p.val	mean methylation in unmeth group	mean methylation in meth group	Spearman correlation
cg20815778	hsa-mir-30a|MIMAT0000087	4.634	5.119	-0.227	0.834	0.852	0.086	0.441	-0.064
cg10039188	hsa-mir-30a|MIMAT0000087	6.584	3.957	3.84	0.000161	0.00123	0.031	0.459	-0.225
cg25210451	hsa-mir-30a|MIMAT0000087	6.567	3.892	3.938	0.000111	0.00109	0.04	0.499	-0.184
cg15045441	hsa-mir-30a|MIMAT0000087	6.814	4.003	3.79	0.000201	0.00123	0.052	0.435	-0.225
cg26162616	hsa-mir-30a|MIMAT0000087	6.931	3.977	3.824	0.000179	0.00123	0.04	0.421	-0.23
cg23281154	hsa-mir-30a|MIMAT0000087	6.685	4.174	3.361	0.00102	0.00385	0.033	0.382	-0.24
cg22300282	hsa-mir-30a|MIMAT0000087	8.386	3.984	2.256	0.0287	0.0586	0.077	0.518	-0.199
cg11574469	hsa-mir-30a|MIMAT0000087	8.278	4.066	2.359	0.022	0.051	0.078	0.428	-0.244
cg25141674	hsa-mir-30a|MIMAT0000087	7.363	4.151	2.842	0.00535	0.0162	0.063	0.495	-0.23
cg24772267	hsa-mir-30a|MIMAT0000087	6.694	4.29	2.359	0.0198	0.0484	0.077	0.472	-0.122
cg00920327	hsa-mir-30a|MIMAT0000087	7.006	4.052	3.642	0.000352	0.00192	0.058	0.465	-0.247
cg03318695	hsa-mir-30a|MIMAT0000087	7.396	4.395	1.562	0.125	0.192	0.075	0.487	-0.221
cg20815778	hsa-mir-30a|MIMAT0000088	1.936	1.845	0.081	0.94	0.94	0.086	0.441	-0.073
cg10039188	hsa-mir-30a|MIMAT0000088	2.331	1.351	4.494	1.19e-05	0.000146	0.031	0.459	-0.196
cg25210451	hsa-mir-30a|MIMAT0000088	2.303	1.3	4.876	2.52e-06	8.69e-05	0.04	0.499	-0.181
cg15045441	hsa-mir-30a|MIMAT0000088	2.44	1.361	4.62	7.85e-06	0.000128	0.052	0.435	-0.216
cg26162616	hsa-mir-30a|MIMAT0000088	2.451	1.336	4.778	3.55e-06	8.69e-05	0.04	0.421	-0.232
cg23281154	hsa-mir-30a|MIMAT0000088	2.386	1.481	3.61	0.000522	0.00232	0.033	0.382	-0.243
cg22300282	hsa-mir-30a|MIMAT0000088	2.752	1.385	3.396	0.00124	0.00435	0.077	0.518	-0.222
cg11574469	hsa-mir-30a|MIMAT0000088	2.69	1.43	3.335	0.00138	0.0045	0.078	0.428	-0.218
cg25141674	hsa-mir-30a|MIMAT0000088	2.602	1.479	3.423	0.000809	0.0033	0.063	0.495	-0.243
cg24772267	hsa-mir-30a|MIMAT0000088	2.37	1.637	2.132	0.037	0.0726	0.077	0.472	-0.138
cg00920327	hsa-mir-30a|MIMAT0000088	2.445	1.454	3.589	0.000474	0.00232	0.058	0.465	-0.219
cg03318695	hsa-mir-30a|MIMAT0000088	2.521	1.585	2.307	0.0241	0.0514	0.075	0.487	-0.222
cg22904815	hsa-mir-30b|MIMAT0000420	0.266	0.174	2.449	0.0229	0.051	0.078	0.326	-0.151
cg10039188	hsa-mir-30c-2|MIMAT0000244	0.316	0.26	1.875	0.0636	0.12	0.031	0.459	-0.132
cg25210451	hsa-mir-30c-2|MIMAT0000244	0.316	0.26	1.814	0.0729	0.131	0.04	0.499	-0.034
cg15045441	hsa-mir-30c-2|MIMAT0000244	0.321	0.271	1.451	0.151	0.218	0.052	0.435	-0.095
cg26162616	hsa-mir-30c-2|MIMAT0000244	0.323	0.27	1.69	0.0938	0.148	0.04	0.421	-0.072
cg23281154	hsa-mir-30c-2|MIMAT0000244	0.316	0.259	1.438	0.158	0.221	0.033	0.382	-0.109
cg22300282	hsa-mir-30c-2|MIMAT0000244	0.272	0.256	0.438	0.662	0.705	0.077	0.518	-0.025
cg11574469	hsa-mir-30c-2|MIMAT0000244	0.325	0.257	1.726	0.0878	0.143	0.078	0.428	-0.099
cg25141674	hsa-mir-30c-2|MIMAT0000244	0.306	0.262	1.368	0.174	0.236	0.063	0.495	-0.084
cg24772267	hsa-mir-30c-2|MIMAT0000244	0.286	0.255	0.801	0.427	0.498	0.077	0.472	-0.016
cg00920327	hsa-mir-30c-2|MIMAT0000244	0.327	0.246	2.55	0.0123	0.0336	0.058	0.465	-0.101
cg03318695	hsa-mir-30c-2|MIMAT0000244	0.317	0.279	0.871	0.387	0.474	0.075	0.487	-0.077
cg22904815	hsa-mir-30d|MIMAT0000245	5.321	4.432	1.504	0.148	0.218	0.078	0.326	-0.137
cg16167741	hsa-mir-30e|MIMAT0000692	4.234	4.02	0.571	0.569	0.619	0.07	0.549	0.03
cg26783428	hsa-mir-30e|MIMAT0000692	5.041	4.302	0.634	0.568	0.619	0.089	0.519	0.016
cg27386837	hsa-mir-30e|MIMAT0000692	4.655	3.407	2.447	0.0169	0.0436	0.086	0.46	-0.151
cg13735974	hsa-mir-30e|MIMAT0000692	4.383	3.508	1.82	0.0774	0.131	0.085	0.502	-0.149
cg10336144	hsa-mir-30e|MIMAT0000692	4.597	3.372	2.827	0.00561	0.0162	0.082	0.489	-0.117
cg14796708	hsa-mir-30e|MIMAT0000692	3.92	3.828	0.213	0.832	0.852	0.082	0.429	0.018
cg16167741	hsa-mir-30e|MIMAT0000693	5.153	4.779	0.987	0.325	0.409	0.07	0.549	-0.072
cg26783428	hsa-mir-30e|MIMAT0000693	6.638	5.117	0.957	0.407	0.486	0.089	0.519	-0.034
cg27386837	hsa-mir-30e|MIMAT0000693	5.98	4.76	1.794	0.0775	0.131	0.086	0.46	-0.184
cg13735974	hsa-mir-30e|MIMAT0000693	5.932	4.931	1.244	0.222	0.294	0.085	0.502	-0.157
cg10336144	hsa-mir-30e|MIMAT0000693	5.534	4.884	1.131	0.263	0.34	0.082	0.489	-0.189
cg14796708	hsa-mir-30e|MIMAT0000693	4.657	5.054	-0.77	0.443	0.505	0.082	0.429	0.027

## Sheet: Table S8 clinical correlations
Genetic alterations						Expression vs Smoking											Methylation vs Smoking
miR30A_methylation vs. tumor site(Oral cavity or not)						miR30A_expression vs. smoking status											miR30A methylation vs. smoking status in oral cavity
P-value	6.15e-07					P-value	0.556										P-value	0.436
			test	greater					test	less										test	greater
	Hyper	Hypo					Low_exp	High_exp										Hyper	Hypo
Oral	58	115				Smoker	35	35			Smokers = "Current Smoker"						Smoker	16	29			Smokers = "Current Smoker"
Non-oral	9	97				Others	87	87			Others = "Reformed" + "Non-smoker" + "NA"						Others	42	86			Nonsmokers = Lifelong Non-smoker"
miR30A_expression vs. tumor site						miR30A_expression vs. smoking status											miR30A methylation vs. smoking status in oral cavity
P-value	0.00822					P-value	0.625										P-value	0.518
			test	greater					test	less										test	less
	Low_exp	High_exp					Low_exp	High_exp										Hyper	Hypo
Oral	87	68				Nonsmoker	25	24			Nonsmokers = Lifelong Non-smoker"						Nonsmoker	13	27			Nonsmokers = Lifelong Non-smoker"
Nonoral	35	54				Others	97	98			Others = "Reformed" + "Smoker" + "NA"						Others	45	88			Others = "Reformed" + "Smoker" + "NA"
miR30A_methylation vs. HPV status						miR30A_expression vs. smoking status											miR30A methylation vs. smoking status in oral cavity
P-value	0.0686					P-value	0.531										P-value	0.474
			test	greater					test	greater										test	greater
	Hypo	Hyper					Low_exp	High_exp										Hyper	Hypo
HPVpos	26	3				Smoker	35	35			Smokers = "Current Smoker"						Smoker	16	29			Smokers = "Current Smoker"
HPVneg	163	52				Nonsmoker	25	24			Nonsmokers = Lifelong Non-smoker"						Nonsmoker	13	27			Nonsmokers = Lifelong Non-smoker"
miR30A_expression vs. HPV status						miR30E_expression vs. smoking status											miR30E methylation vs. smoking status in oral cavity
P-value	0.117					P-value	0.336										P-value	0.365
			test	greater					test	greater										test	less
	High_exp	Low_exp					Low_exp	High_exp										Hyper	Hypo
HPVpos	18	11				Smoker	37	33			Smokers = "Current Smoker"						Smoker	5	40			Smokers = "Current Smoker"
HPVneg	104	111				Others	85	89			Others = "Reformed" + "Non-smoker" + "NA"						Others	19	109			Nonsmokers = Lifelong Non-smoker"
miR30E_CNV vs. tumor site(Larynx or not)						miR30E_expression vs. smoking status											miR30E methylation vs. smoking status in oral cavity
P-value	0.00184					P-value	0.261										P-value	0.496
			test	greater					test	less										test	greater
	Del	Non_del					Low_exp	High_exp										Hyper	Hypo
Larynx	18	46				Nonsmoker	22	27			Nonsmokers = Lifelong Non-smoker"						Nonsmoker	6	34			Nonsmokers = Lifelong Non-smoker"
Nonlarynx	20	160				Others	100	95			Others = "Reformed" + "Smoker" + "NA"						Others	18	115			Others = "Reformed" + "Smoker" + "NA"
miR30E_expression vs. tumor site(Larynx or not)						miR30E_expression vs. smoking status											miR30E methylation vs. smoking status in oral cavity
P-value	0.154					P-value	0.252										P-value	0.416
			test	less					test	greater										test	less
	Low_exp	High_exp					Low_exp	High_exp										Hyper	Hypo
Larynx	28	36				Smoker	37	33			Smokers = "Current Smoker"						Smoker	5	40			Smokers = "Current Smoker"
Nonlarynx	94	86				Nonsmoker	22	27			Nonsmokers = Lifelong Non-smoker"						Nonsmoker	6	34			Nonsmokers = Lifelong Non-smoker"
miR30E_CNV vs. HPV status						miR30E_expression vs. smoking status in oral cavity patients
P-value	0.00527					P-value	0.0219
			test	greater					test	greater
	Non_del	Del					Low_exp	High_exp
HPVpos	29	0				Smoker	25	13			Smokers = "Current Smoker"
HPVneg	177	38				Others	53	64			Others = "Reformed" + "Non-smoker" + "NA"
miR30E_expression vs. HPV status						miR30E_expression vs. smoking status in oral cavity patients
P-value	0.000121					P-value	0.482
			test	greater					test	less
	High_exp	Low_exp					Low_exp	High_exp
HPVpos	24	5				Nonsmoker	18	19			Nonsmokers = Lifelong Non-smoker"
HPVneg	98	117				Others	60	58			Others = "Reformed" + "Smoker" + "NA"
						miR30E_expression vs. smoking status in oral cavity patients
						P-value	0.102
									test	greater
							Low_exp	High_exp
						Smoker	25	13			Smokers = "Current Smoker"
						Nonsmoker	18	19			Nonsmokers = Lifelong Non-smoker"
						miR30E_expression vs. smoking status in oropharynx patients
						P-value	0.541
									test	greater
							Low_exp	High_exp
						Smoker	3	2			Smokers = "Current Smoker"
						Others	10	10			Others = "Reformed" + "Non-smoker" + "NA"
						miR30E_expression vs. smoking status in oropharynx patients
						P-value	0.286
									test	less
							Low_exp	High_exp
						Nonsmoker	3	5			Nonsmokers = Lifelong Non-smoker"
						Others	10	7			Others = "Reformed" + "Smoker" + "NA"
						miR30E_expression vs. smoking status in oropharynx patients
						P-value	0.413
									test	greater
							Low_exp	High_exp
						Smoker	3	2			Smokers = "Current Smoker"
						Nonsmoker	3	5			Nonsmokers = Lifelong Non-smoker"
